# Supplementary material for: Charge-switchable zwitterionic nanomagnets for wastewater remediation
Source: Royal Society of Chemistry journal article supplement (doi:10.1039/d4na00730a), 2024-11-21
Supplement: d4na00730a1.pdf [file d4na00730a1.pdf]

**Supporting Information for**

**Charge-switchable zwitterionic nanomagnets for wastewater remediation**

Sohel Reja,\* and Sukumaran Vasudevan

*<sup>a</sup> Department of Inorganic and Physical Chemistry,*

*Indian Institute of Science, Bangalore-560012, India*

\*Corresponding Author: sohelreja@iisc.ac.in

Table of contents:

1. Determination of isoelectric point
2. Adsorbent regeneration test
3. Fig. S1: SAED and FFT of NTA@SPIONs.
4. Fig. S2: Time-dependent DLS of NTA@SPIONs.
5. Fig. S3: Langmuir isotherm fitting for the pollutants.
6. Fig. S4: Pseudo-second order fitting for the pollutants.
7. Fig. S5: PXRD plot of NTA@SPIONs before and after  $\text{Cr}_2\text{O}_7^{2-}$  adsorption.
8. Fig. S6: TEM of NTA@SPIONs before and after  $\text{Cr}_2\text{O}_7^{2-}$  adsorption.
9. Fig. S7: EDS mapping of NTA@SPIONs before and after  $\text{Cr}_2\text{O}_7^{2-}$  adsorption.
10. Table S1: Langmuir fitting parameters for the pollutants.
11. Table S2: Pseudo-second order fitting parameters for the pollutants.

**Determination of isoelectric point (IEP):**

The isoelectric point of the NTA@SPIONs was determined by recording the zeta potential of the particle dispersions over a range of pH from 3 to 7. The medium pH was adjusted by the addition of 0.1M HCl. The obtained zeta potential was plotted against pH. The pH at which the plot intersects  $\zeta=0$  is taken as the isoelectric point.

**Reusability tests:**

After adsorption, the magnetically collected adsorbent material was dispersed in proper eluting mediums, followed by bath sonication, to desorb the loaded dye species. For MB, an HCL solution (pH=3) was used, and for CR, a NaOH solution (pH=11) was employed as the eluting medium. Following the elution, the adsorbent material was collected with a bar magnet. The whole eluting process was repeated twice. Finally, the adsorbent material was washed thoroughly with miliQ water and dried overnight. For the reusability test, the adsorption-desorption cycle was repeated five times. After each cycle, the supernatant was analyzed to estimate the removal efficiency of the adsorbent.

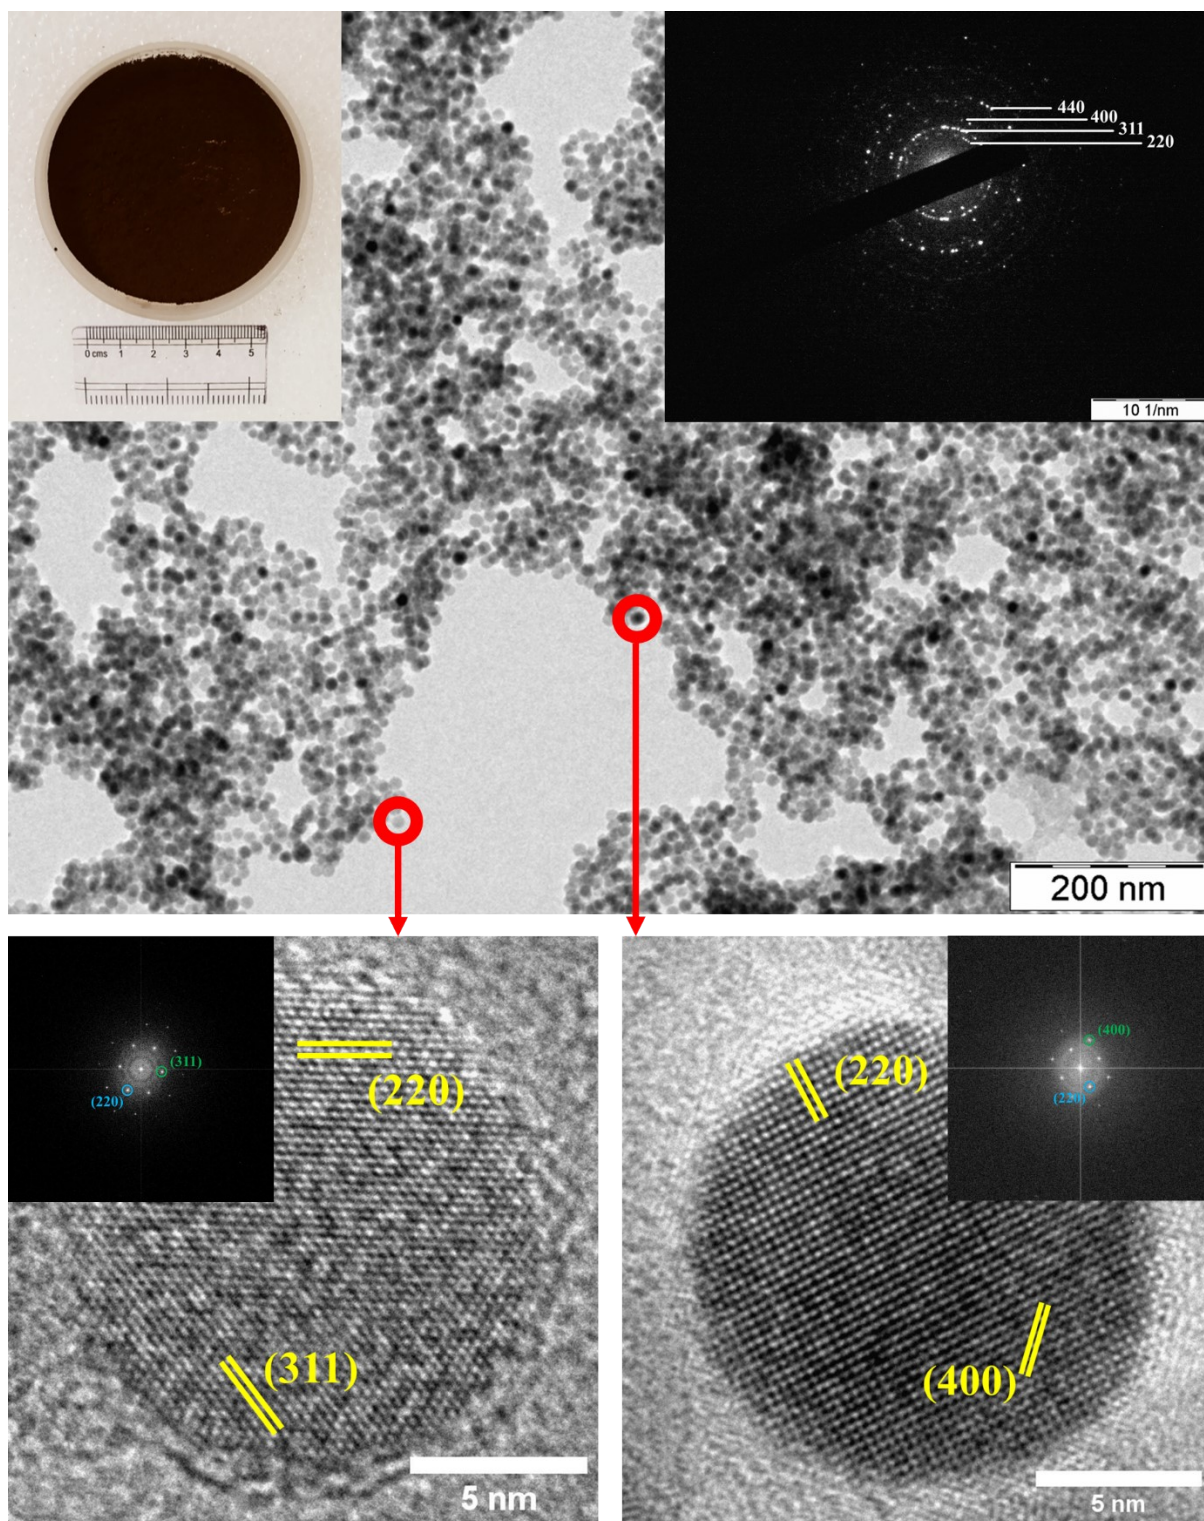

Figure S1: Large-area TEM image of NTA@SPIONs with a photograph of material obtained from a single batch (left inset) and indexed SAED pattern matching with spinel magnetite phase (right inset). HRTEM and corresponding FFT (inset) for a particle with (a) light, and (b) dark contrast. Indexed planes match with the spinel magnetite phase.

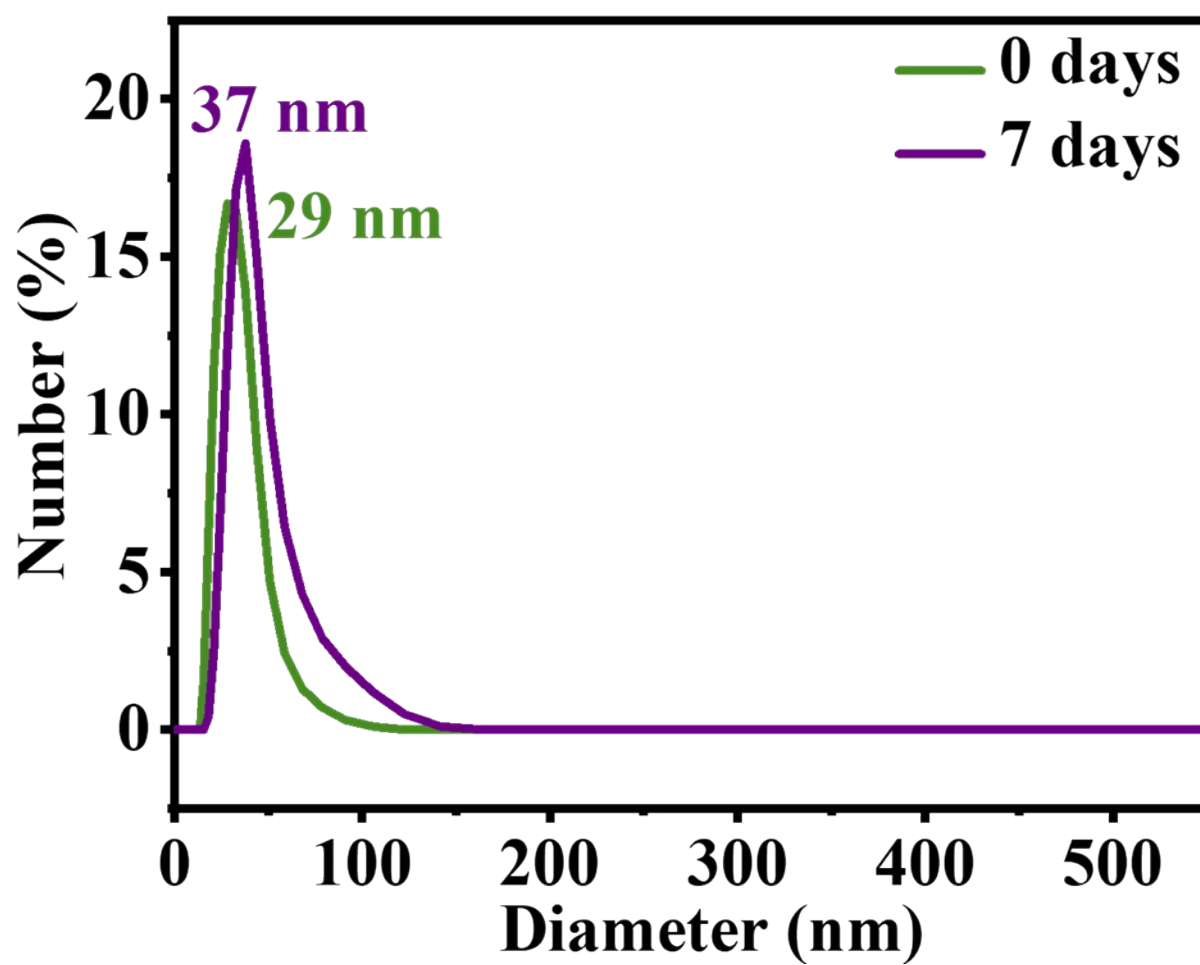

Figure S2: Hydrodynamic particle size measurement (DLS) of NTA@SPIONs immediately after preparation and after a gap of seven days.

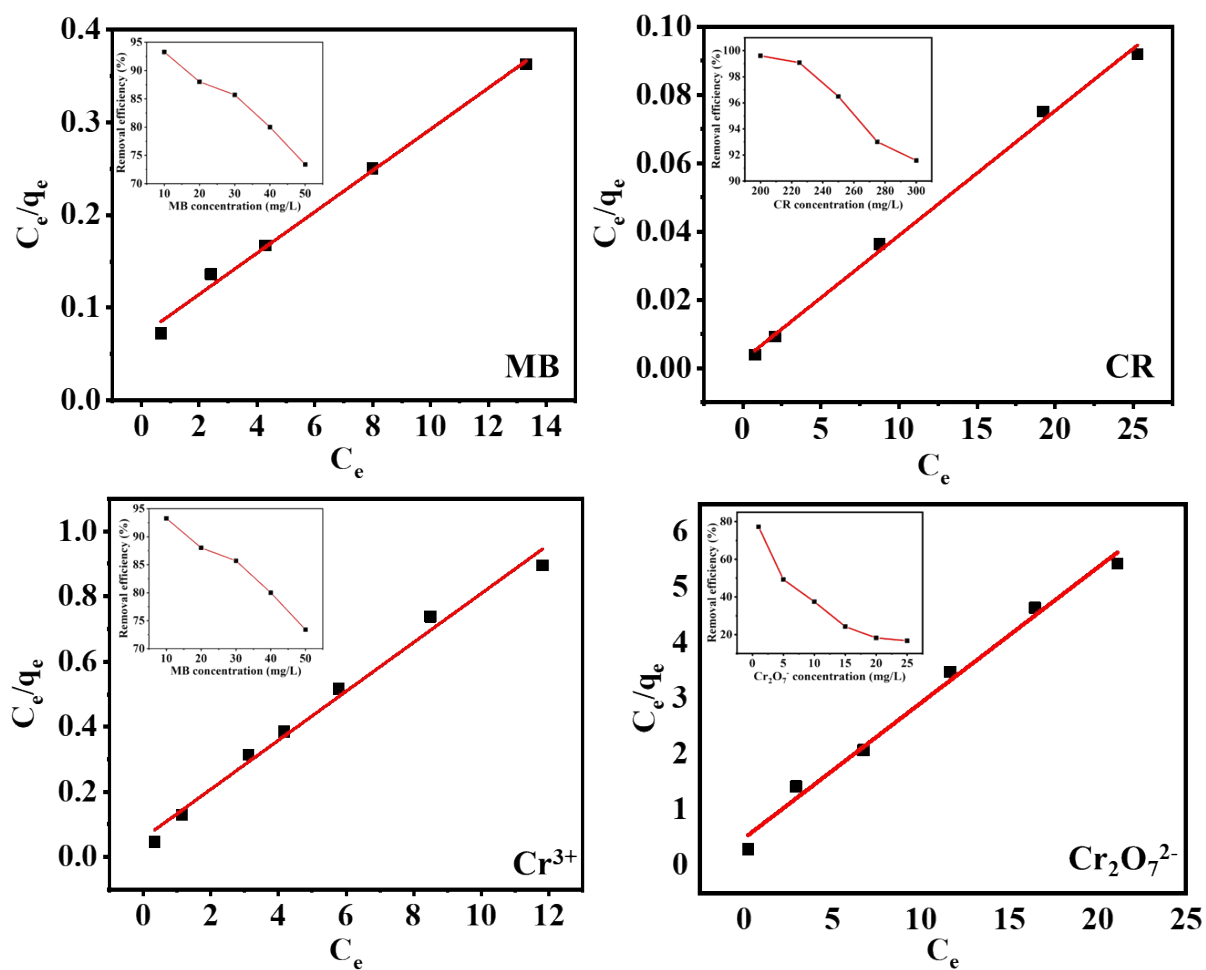

Figure S3: Langmuir isotherm fitting for MB, CR,  $\text{Cr}^{3+}$  and  $\text{Cr}_2\text{O}_7^{2-}$ . Inset shows the dependency of removal efficiency on adsorbate concentration.

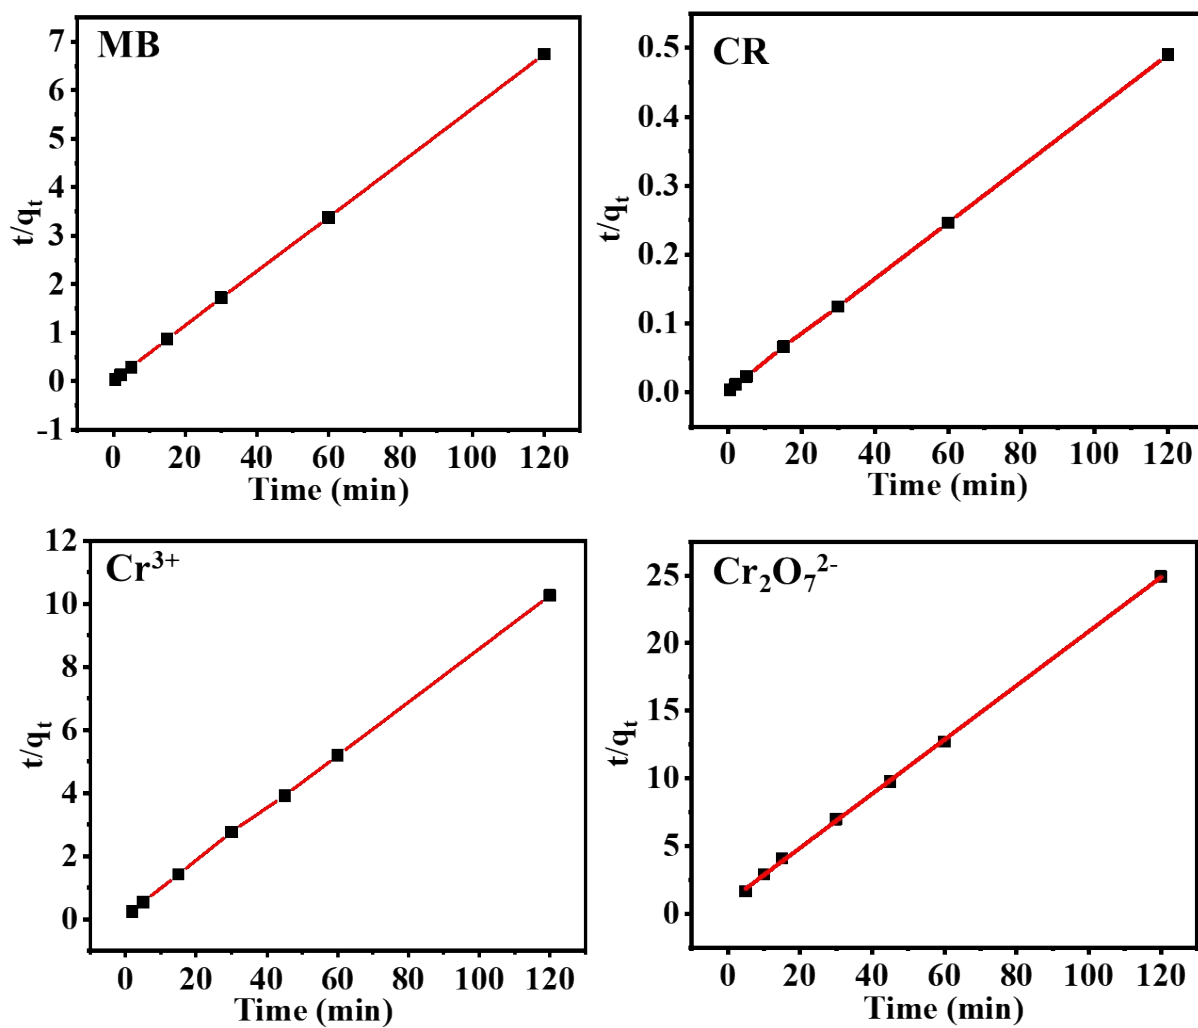

Figure S4: Pseudo-second order kinetics fitting for MB, CR,  $\text{Cr}^{3+}$  and  $\text{Cr}_2\text{O}_7^{2-}$ .

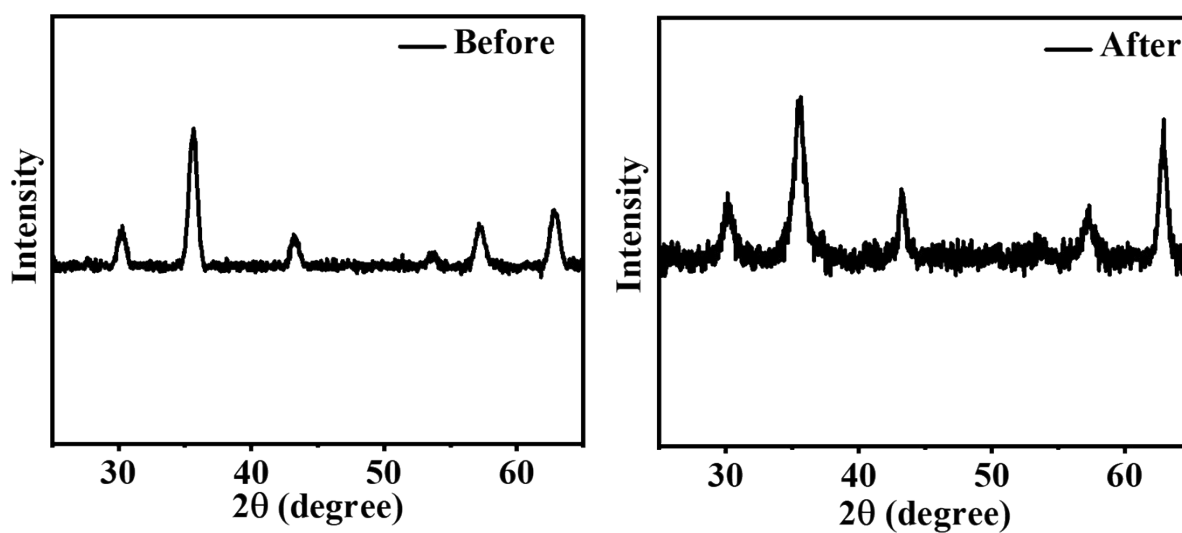

Figure R5: PXRD of the NTA@SPIONs before and after  $\text{Cr}_2\text{O}_7^{2-}$  adsorption.

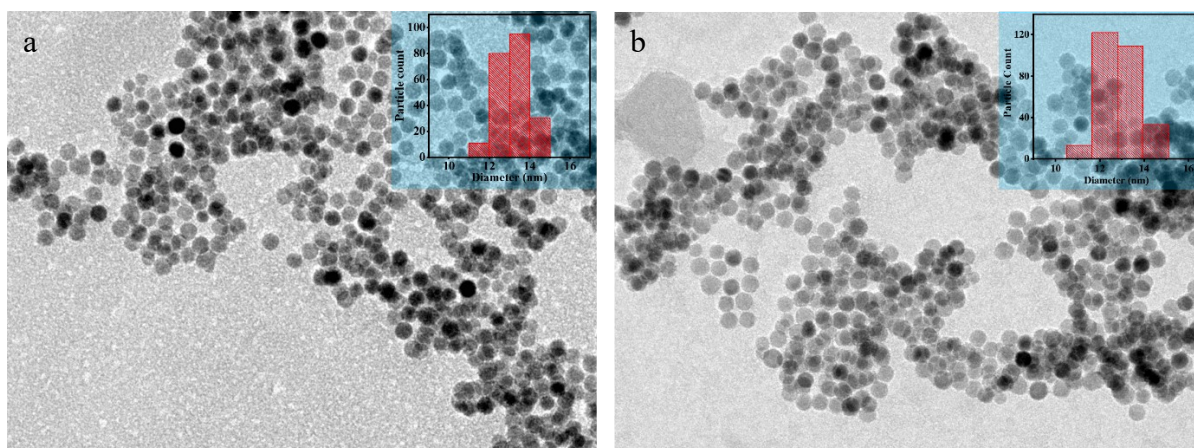

Figure R6: TEM images of the NTA@SPIONs (a) before and (b) after  $\text{Cr}_2\text{O}_7^{2-}$  adsorption.

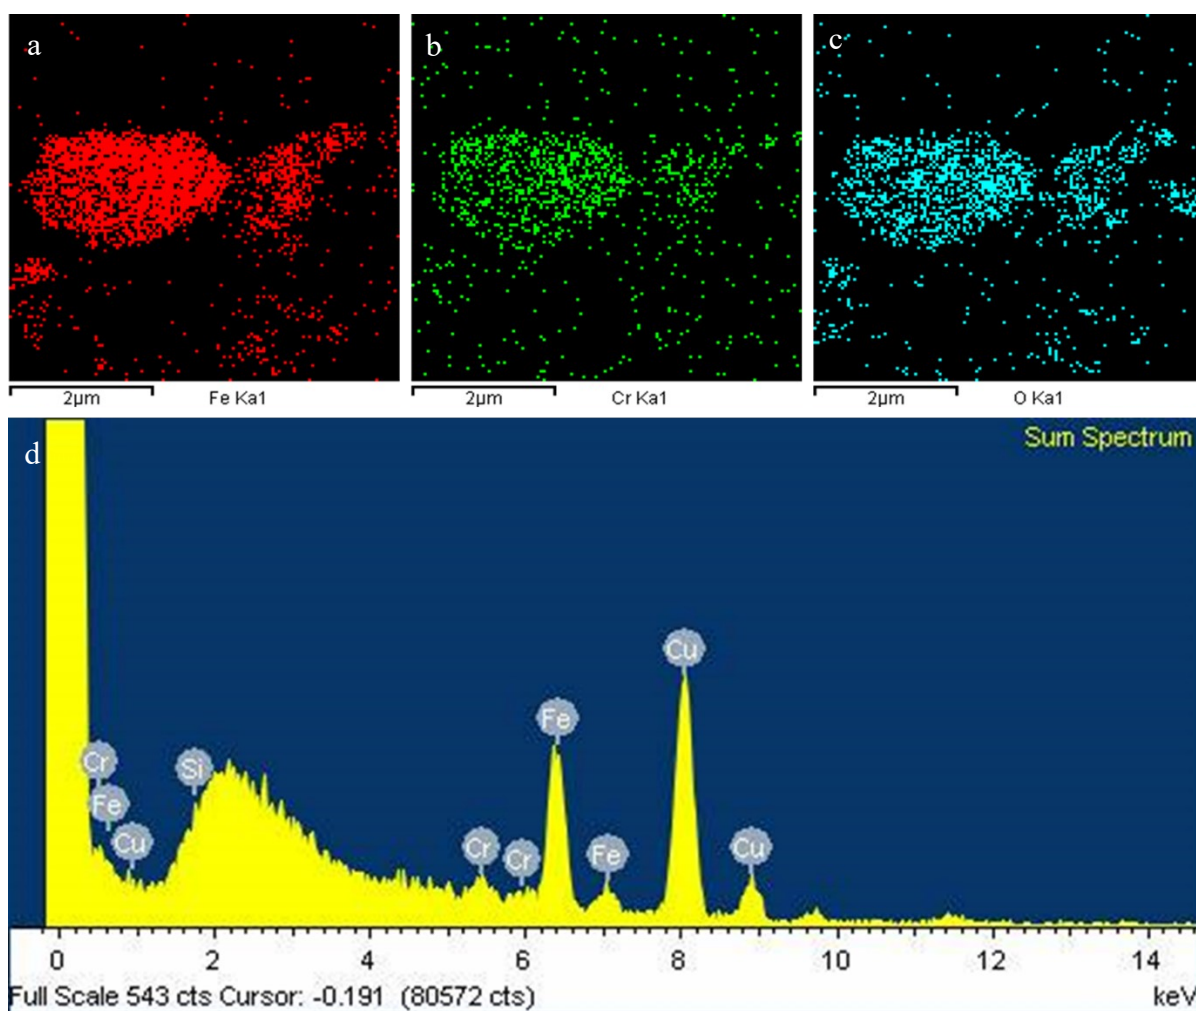

Figure R7: EDS elemental mapping of the NTA@SPIONs after  $\text{Cr}_2\text{O}_7^{2-}$  adsorption at pH 4 (a) Fe, (b) Cr, and (c) O. (d) EDS spectrum of the NTA@SPIONs after  $\text{Cr}_2\text{O}_7^{2-}$  adsorption.

| Model                                       | Langmuir |      |       |
|---------------------------------------------|----------|------|-------|
| Parameters                                  | $q_m$    | $b$  | $R^2$ |
| MB                                          | 44.98    | 0.32 | 0.99  |
| CR                                          | 273.79   | 1.51 | 0.99  |
| Cr <sup>3+</sup>                            | 13.31    | 1.29 | 0.98  |
| Cr <sub>2</sub> O <sub>7</sub> <sup>-</sup> | 4.10     | 0.49 | 0.98  |

Table S1: Langmuir isotherm fitting parameter for the pollutants.

| Model                                       | Pseudo-second order |       |
|---------------------------------------------|---------------------|-------|
| Parameters                                  | $k$                 | $R^2$ |
| MB                                          | 0.202               | 0.99  |
| CR                                          | 0.052               | 0.99  |
| Cr <sup>3+</sup>                            | 0.054               | 0.99  |
| Cr <sub>2</sub> O <sub>7</sub> <sup>-</sup> | 0.046               | 0.99  |

Table S2: Pseudo-second order fitting parameter for the pollutants.

## References:

- 1 S. Reja, M. Kumar and S. Vasudevan, *Nanoscale Adv.*, 2024, 3857–3864.
- 2 X. Zhang, P. Zhang, Z. Wu, L. Zhang, G. Zeng and C. Zhou, *Colloids Surfaces A Physicochem. Eng. Asp.*, 2013, **435**, 85–90.
- 3 S. Yesmin, M. Mahiuddin, A. B. M. Nazmul Islam, K. M. R. Karim, P. Saha, M. A. R. Khan and H. M. Ahsan, *ACS Omega*, , DOI:10.1021/acsomega.3c09557.
- 4 S. Technology, A. Wiryawan, R. Retnowati and R. Y. P. Burhan, 2018, **05**, 37–46.
- 5 A. Lace, D. Ryan, M. Bowkett and J. Cleary, *Int. J. Environ. Res. Public Health*, , DOI:10.3390/ijerph16101803.
- 6 T. Shigematsu, S. Gohda, H. Yamazaki and Y. Nishikawa, *Bull. Inst. Chem. Res., Kyoto Univ.*, 2007, **55**, 429–440.

- 7 A. Wiryawan, R. Retnowati, P. Burhan and S. Syekhfani, *J. Enviromental Eng. Sustain. Technol.*, 2018, **5**, 37.
